# Supplementary material
Source: Springer Nature journal article supplement (https://www.springermedizin.de/resource/supplementary/12968_2010_2015_MOESM3_ESM.pdf/9581110)
Supplement: MOESM3 [file 9581110]

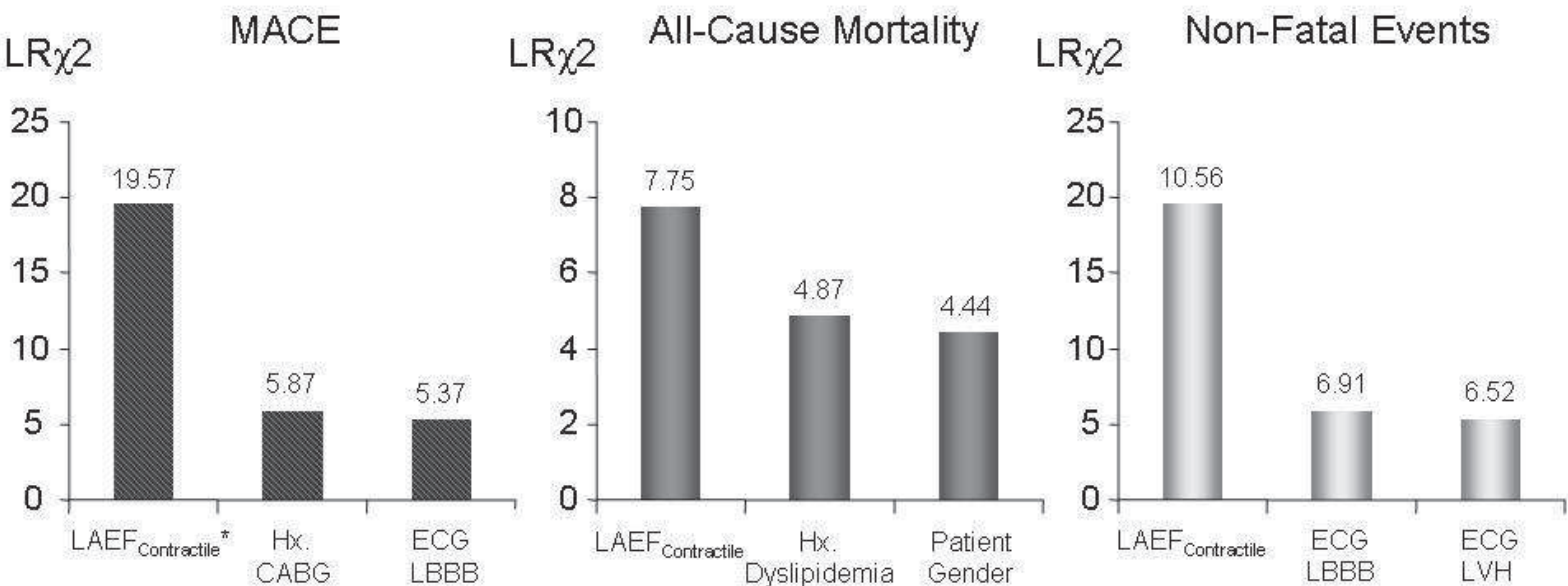

\*LAEF<sub>Contractile</sub> is a continuous variable

CABG = coronary artery bypass surgery; LBBB = left bundle branch block on ECG
